# Supplementary material for: Protective Effect of Rhus chinensis Mill. Fruits on 3,5-Diethoxycarbonyl-1,4-Dihydrocollidine-Induced Cholestasis in Mice via Ameliorating Oxidative Stress and Inflammation
Source: MDPI journal article supplement (doi:10.3390/nu14194090), 2022-10-01
Supplement: s1 [file s1]

## Supporting Information

### **Characterization of the major bioactive compounds in the ethanol extract of *Rhus chinensis* Mill.**

The major bioactive compounds in the ethanol extract of *Rhus chinensis* Mill. fruits were separated by using a Thermo Fisher Ultimate 3000 UHPLC System (Thermo Fisher Scientific, Germany) coupled with an Agilent Zorbax SB-C18 column (1.7  $\mu\text{m}$ , 2.1 mm  $\times$  100 mm), and then characterized by a high-resolution mass spectrometer (Q-Exactive Orbitrap, Thermo Fisher Scientific, Bremen, Germany) in the negative mode. The parameters of HPLC were set as follows: mobile phases, 0.1% formic acid in water (A) and acetonitrile (B); flow rate, 0.1 mL/min; elution procedure, 0–2min, 5% B; 2–4min, 5%–20% B; 4–12min, 20%–30% B; 12–15min, 30%–50% B; 15–18min, 50%–5% B; 18–20min, 5% B; column temperature, 30°C; volume of sample injection, 2.0  $\mu\text{L}$ . The following Mass parameters were used in the current work: full MS scan range, 50–1000 m/z; auxiliary gas flow, 9 L/min; sheath gas flow rate, 33 L/min; sweep gas, 4 L/min; S-lens RF level, 50%; spray voltage, 3.3 kV, capillary temperature, 330 °C; heater temperature, 360 °C.

**Figure S1.** The chromatograms of ethanol extracts of *Rhus chinensis* Mill. fruits. Peaks identification and their MS data are shown in Table S1. The base peak chromatogram is shown in Fig. S1.

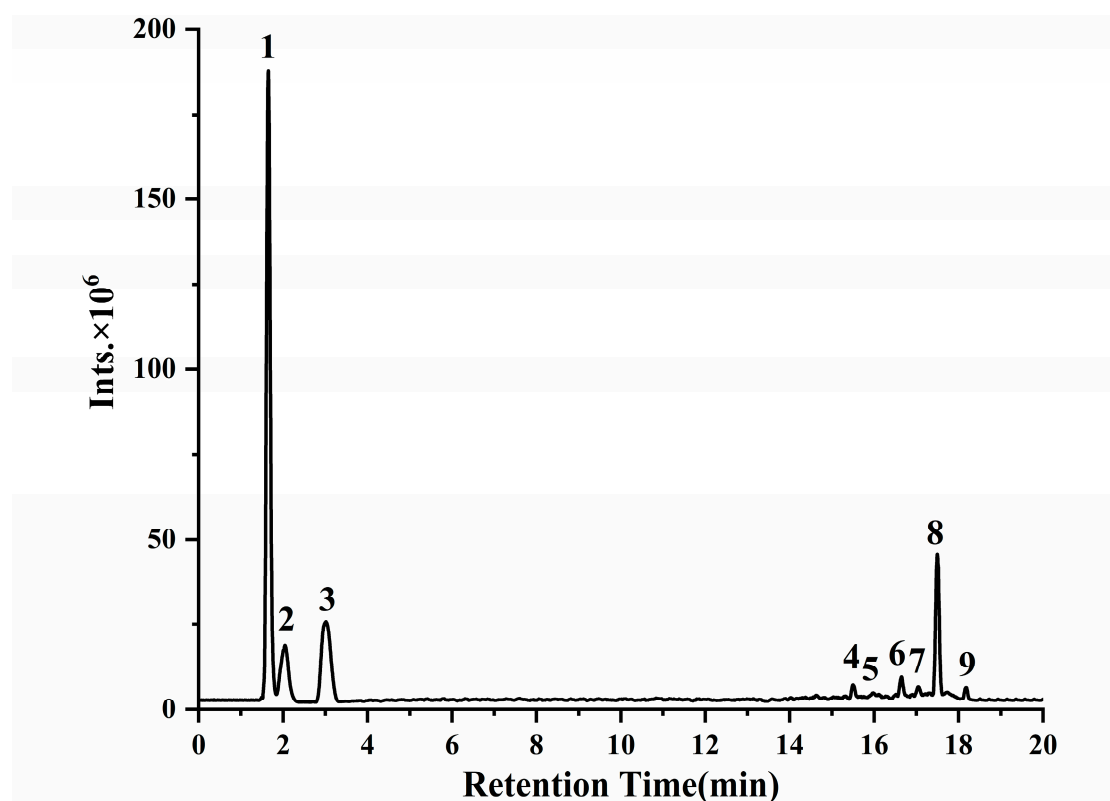

**Table S1** Phenolic compounds identified in *Rhus chinensis* Mill. fruits by UHPLC-ESI-HRMS/MS in negative mode.

| Peak No. | Compounds                             | Molecular formula                               | Retention time (min) | [M-H] <sup>-</sup> ( <i>m/z</i> ) | MS/MS ion fragments               | Dry extract (µg/g)  | Average percentage (%<br>Total identified phenolic content) |
|----------|---------------------------------------|-------------------------------------------------|----------------------|-----------------------------------|-----------------------------------|---------------------|-------------------------------------------------------------|
| 1        | Malic acid                            | C <sub>4</sub> H <sub>6</sub> O <sub>5</sub>    | 1.64                 | 133.0130                          | 71.0124(100),<br>72.9916(27.22)   | ---                 | ---                                                         |
| 2        | Citric acid                           | C <sub>6</sub> H <sub>8</sub> O <sub>7</sub>    | 2.14                 | 191.0189                          | 57.0332(100),<br>67.0174(39.17)   | ---                 | ---                                                         |
| 3        | Gallic acid                           | C <sub>7</sub> H <sub>6</sub> O <sub>5</sub>    | 3.01                 | 169.0132                          | 69.0331(100),<br>97.0281(52.73)   | 3892.57 ±<br>165.42 | 49.15                                                       |
| 4        | Di-O-galloyl-glucoside                | C <sub>20</sub> H <sub>20</sub> O <sub>14</sub> | 15.50                | 483.0779                          | 300.0344(100),301.0344(83<br>.27) | 343.30 ± 18.32      | 4.33                                                        |
| 5        | Trigalloyl glucose                    | C <sub>27</sub> H <sub>24</sub> O <sub>18</sub> | 15.99                | 635.0891                          | 125.0234(100),<br>143.0331(12.55) | 430.43 ± 17.51      | 5.43                                                        |
| 6        | Myricetin-3- <i>O</i> -<br>rhamnoside | C <sub>21</sub> H <sub>20</sub> O <sub>12</sub> | 16.64                | 463.0879                          | 151.0025(100),<br>149.0234(89.09) | 585.05 ± 22.51      | 7.39                                                        |
| 7        | Myricetin- <i>O</i> -gallate          | C <sub>28</sub> H <sub>24</sub> O <sub>16</sub> | 17.04                | 615.1002                          | 151.0027(100),<br>137.0231(47.63) | 595.55. ± 19.35     | 7.52                                                        |
| 8        | Quercetin-3- <i>O</i> -<br>rhamnoside | C <sub>21</sub> H <sub>20</sub> O <sub>11</sub> | 17.49                | 447.0930                          | 151.0026(100),<br>121.0283(15.48) | 1847.03 ±<br>116.85 | 23.32                                                       |
| 9        | Kaempferol-3- <i>O</i> -<br>hexoside  | C <sub>21</sub> H <sub>20</sub> O <sub>10</sub> | 18.17                | 431.0981                          | 227.0347(100),<br>229.0544(77.81) | 225.92 ± 15.34      | 2.85                                                        |

Values are expressed as the mean  $\pm$  SD ( $n = 3$ ,  $\mu\text{g/g}$  of dry extract); each standard curve was set with five different concentrations from 5.00 to 100.00  $\mu\text{g/mL}$  depending on the response intensity. Gallic acid standard was used for quantifying the compounds 3,4 and 5; myricetin-3-*O*-rhamnoside standard was used for quantifying the compounds 6 and 7; quercetin-3-*O*-rhamnoside standard was used for quantifying the compounds 8; kaempferol standard was used for quantifying the compounds 9. All the phenolic standards were purchased from Must bio-technology CO., LTD (Chengdu, Sichuan, China) with purity  $\leq 97\%$ .
